# Supplementary material for: Growth in mid-monsoon dry phases over Indian region:Prevailing influence of anthropogenic aerosols
Source: Copernicus journal article supplement (doi:10.5194/acp-2019-1), 2019-01-09
Supplement: Supplementary file 1 [file acp-2019-1-supplement.pdf]

# Growth in mid-monsoon dry phases over Indian region: Prevailing influence of anthropogenic aerosols

Rohit Chakraborty<sup>1</sup>, Bijay Kumar Guha<sup>2</sup>, Shamitaksha Talukdar<sup>\*1</sup>, Madineni Venkat  
Ratnam<sup>1</sup>, Animesh Maitra<sup>3</sup>

<sup>1</sup>National Atmospheric Research Laboratory, Gadanki, India,

<sup>2</sup>National Institute of Technology, Rourkela, India

<sup>3</sup>Institute of Radiophysics and Electronics, Kolkata, India

[rohite744@gmail.com](mailto:rohite744@gmail.com), [bijayguha74@gmail.com](mailto:bijayguha74@gmail.com), [shamit@narl.gov.in](mailto:shamit@narl.gov.in)\*

## Supplementary Figures

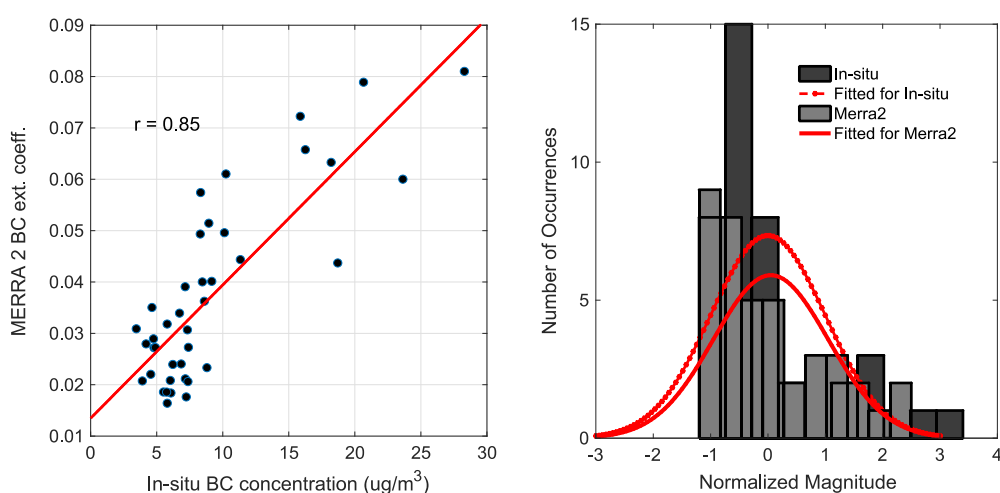

**Figure S1.** Validation of MERRA 2 BC AOT.

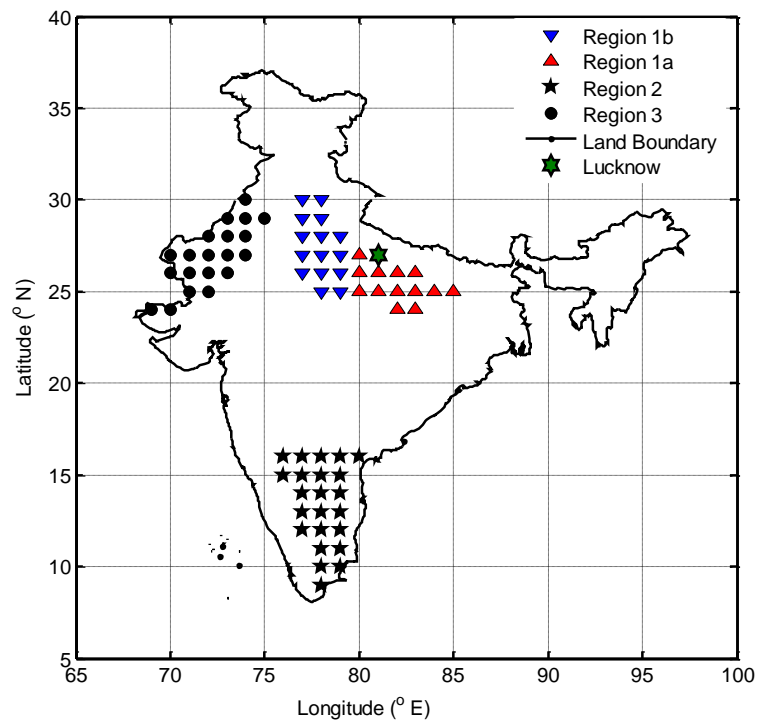

**Figure S2.** Division of the study area into 3 broad regions.

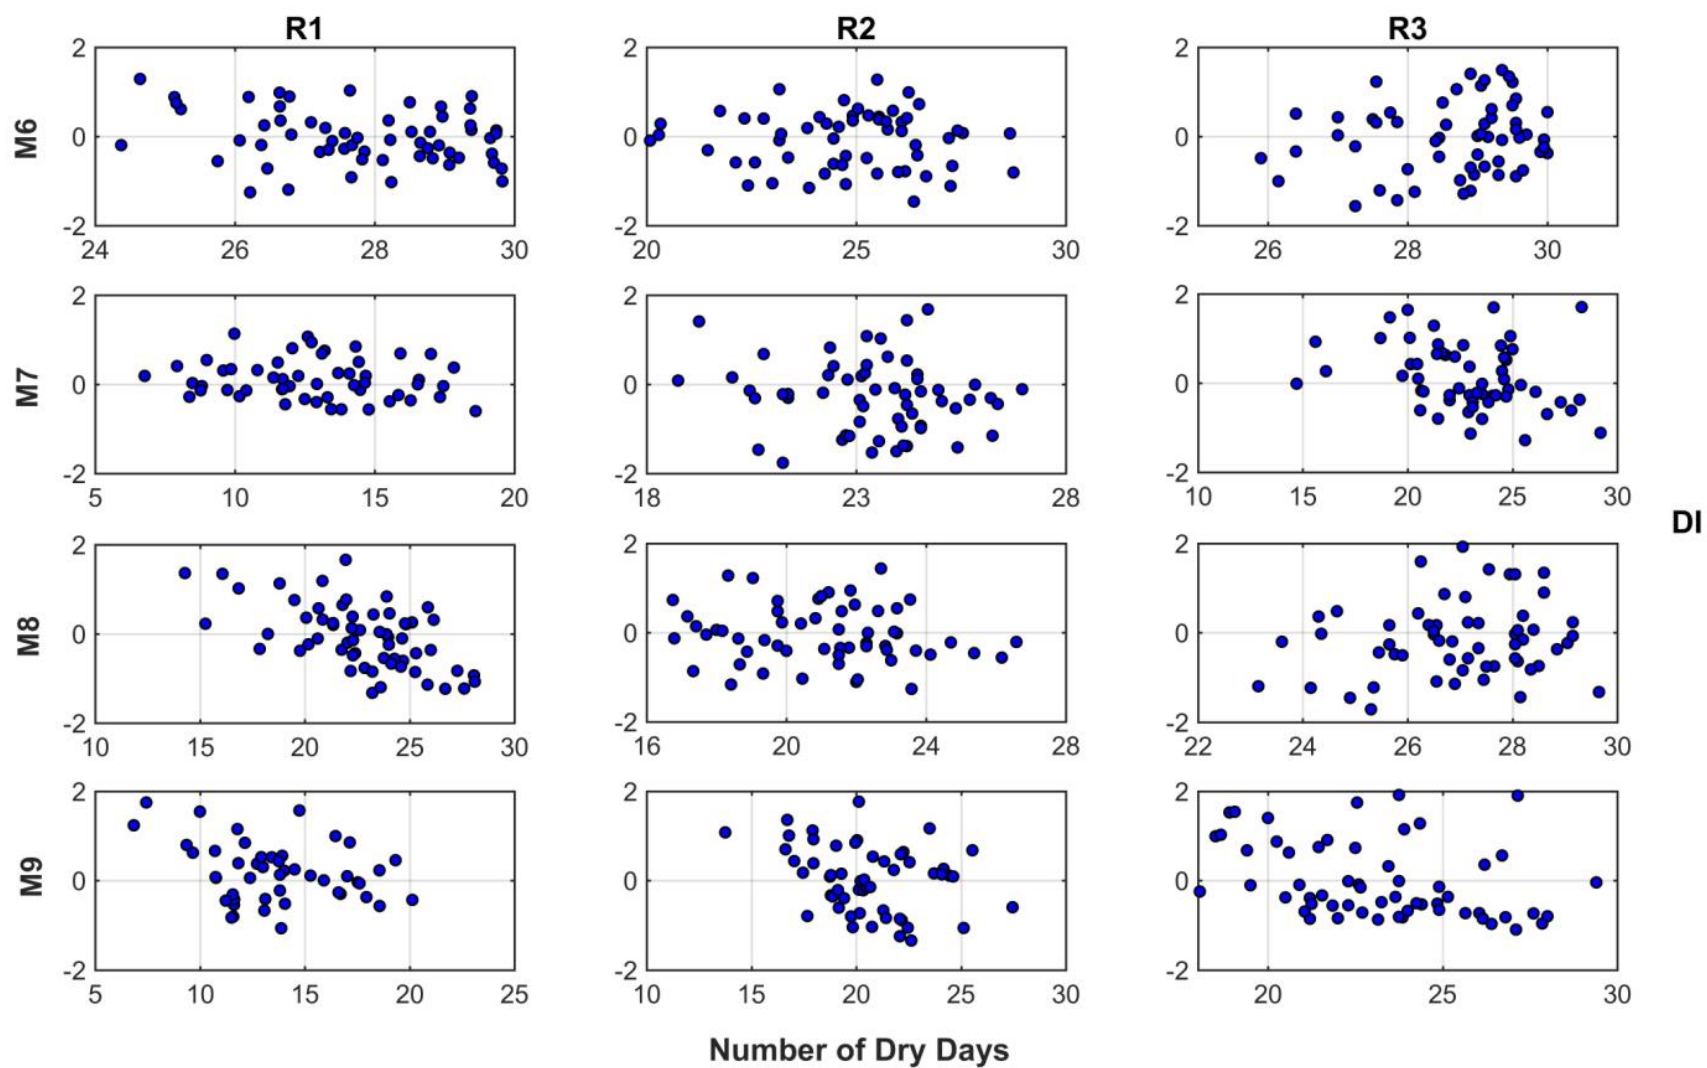

**Figure S3.** Relationship between DDF and DI for different months across three broad regions.

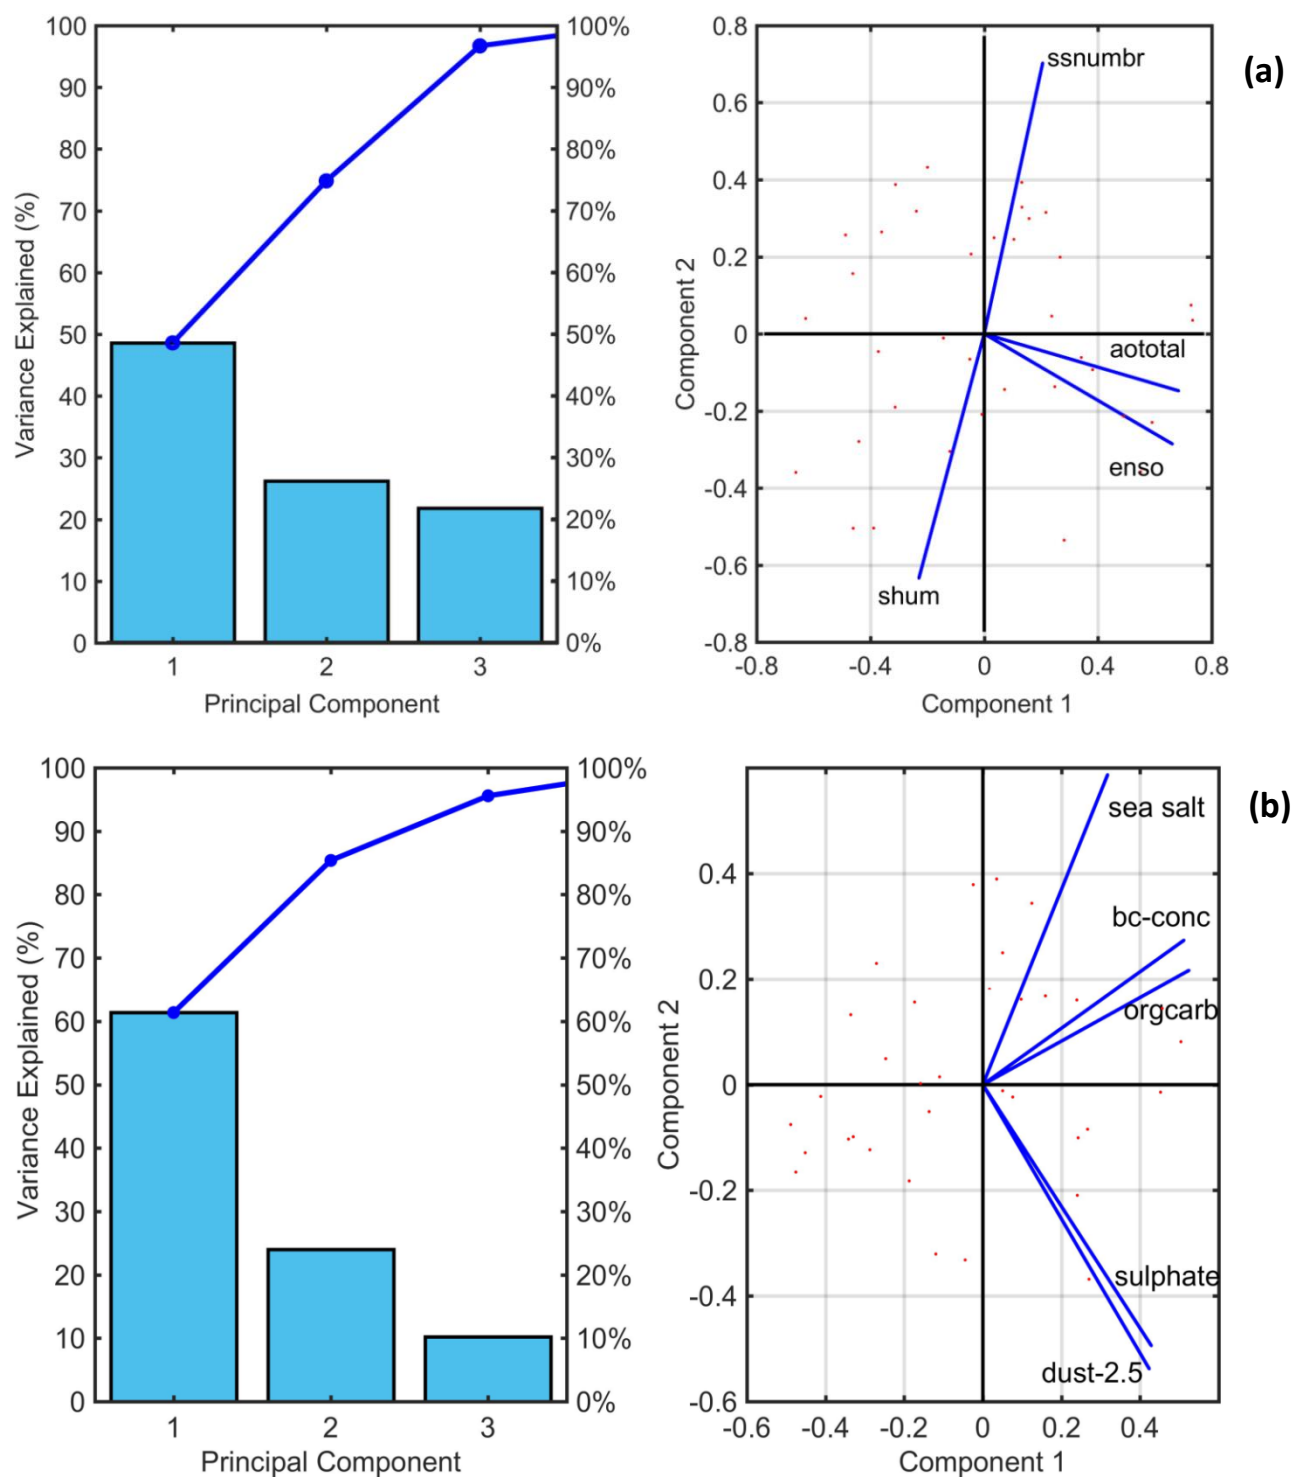

**Figure S4.** Principle Component Analysis results for various controlling factors on DDF for region 1a, (a) using general parameters like total aerosols, SSN, ENSO and humidity (b) Variation of DDF corresponding to 5 aerosol components such as BC, Dust PM 2.5, OC, Sea Salt and Sulphates.

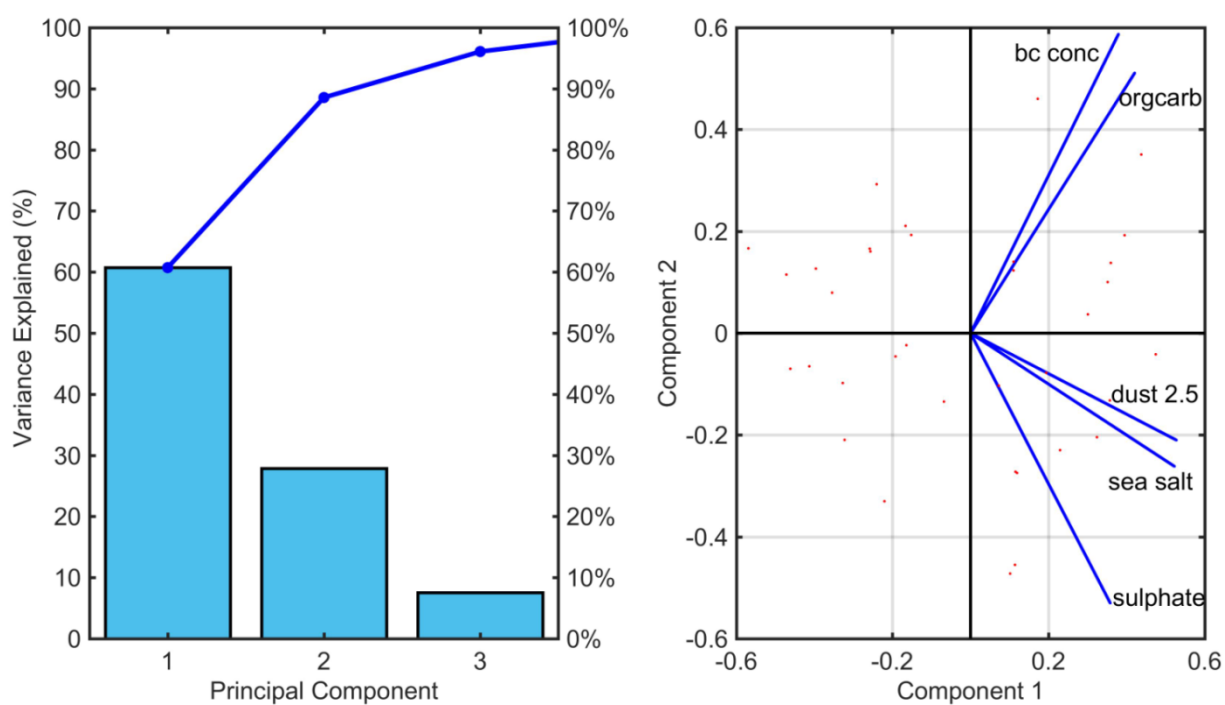

**Figure S5.** Principle Component Analysis results for various controlling factors on DDF for Lucknow corresponding to 5 aerosol components such as BC, Dust PM 2.5, OC, Sea Salt and Sulphates.

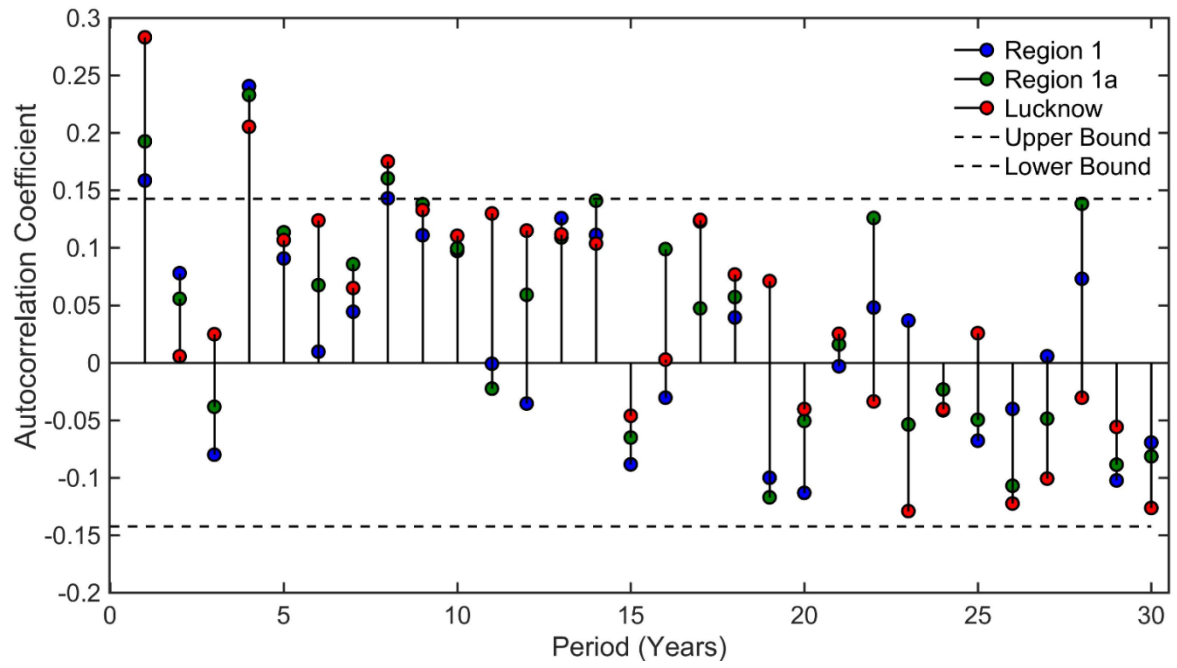

**Figure S6.** Demonstrating the effect of various periodicities in the trends of DDF in August for Region 1, 1a and Lucknow along with 1 sigma confidence bounds.

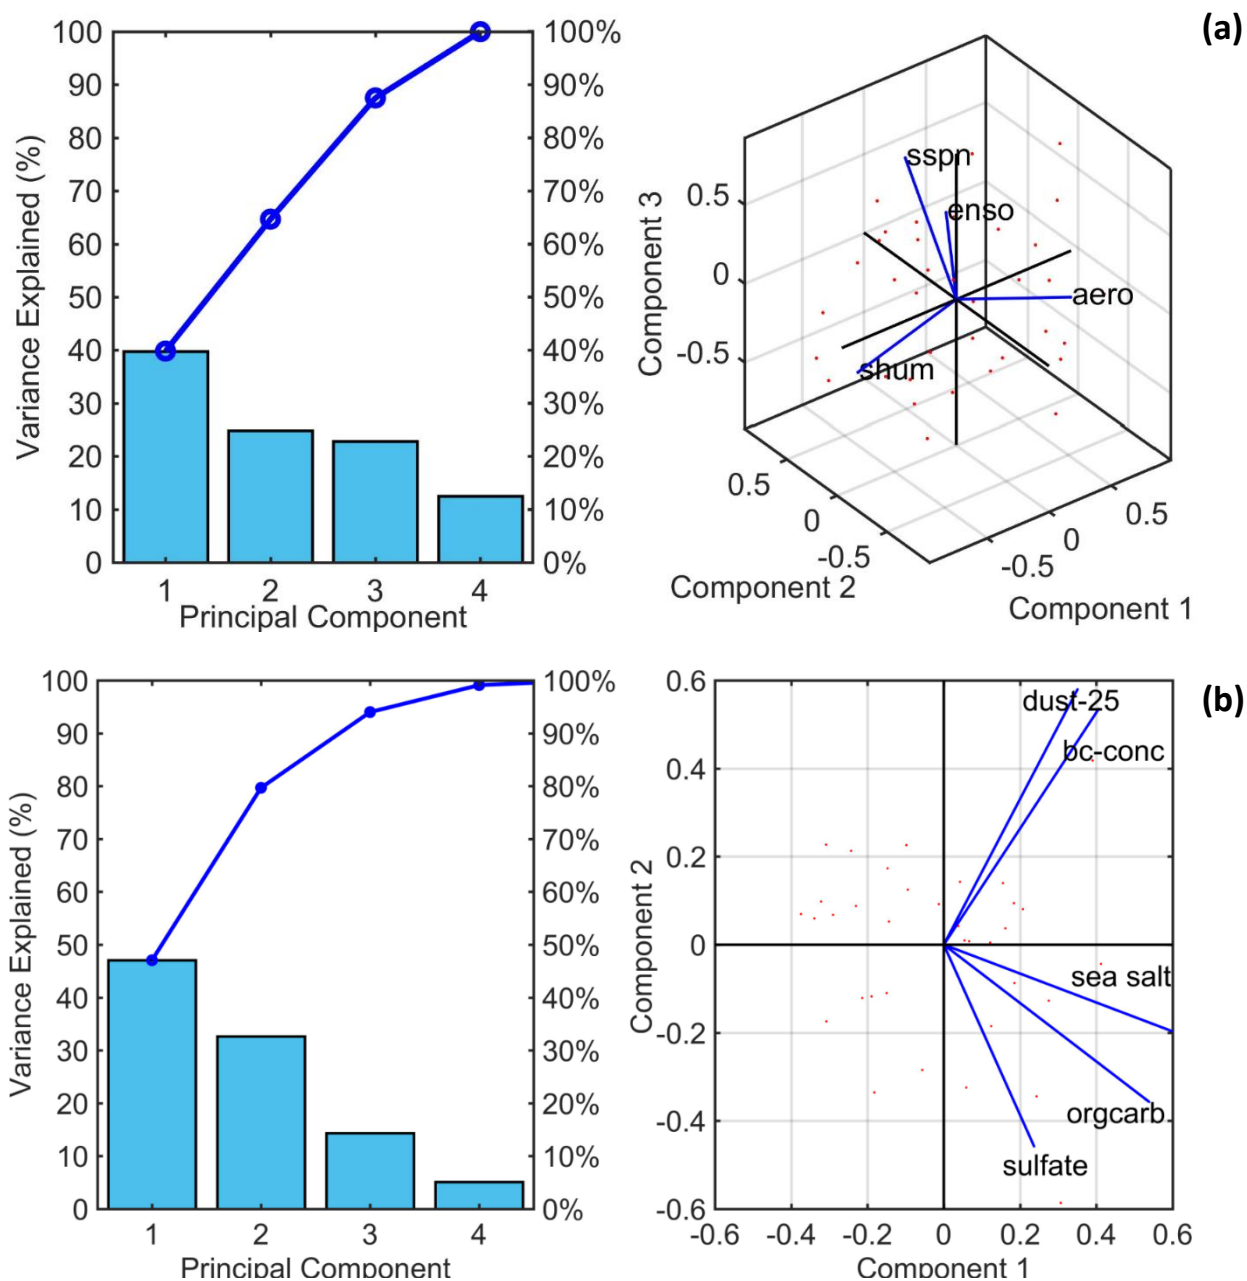

**Figure S7.** Principle Component Analysis results for various controlling factors on DDF for region 3, (a) using general parameters like total aerosols, SSN, ENSO and humidity (b) Variation of DDF corresponding to 5 aerosol components such as BC, Dust PM 2.5, OC, Sea Salt and Sulphates.

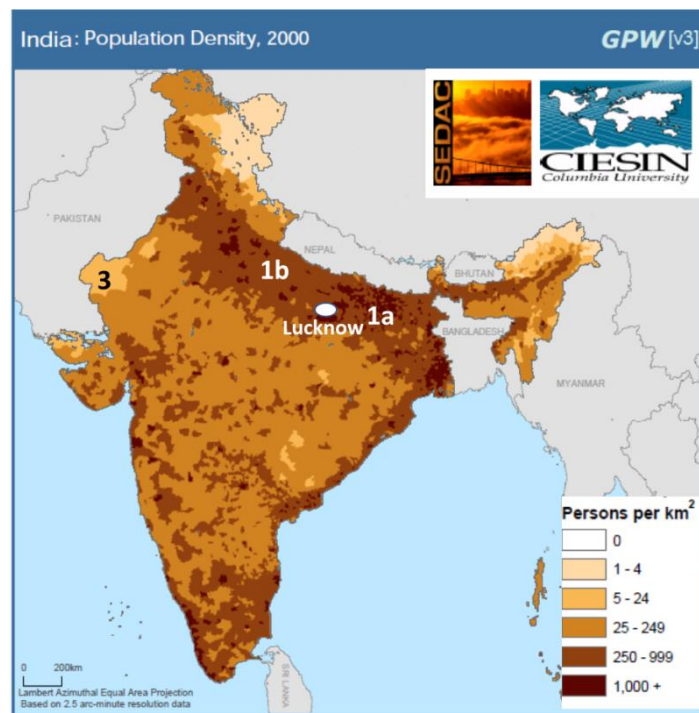

**Figure S8.** District-wise average population densities according to SEDAC in 2000.



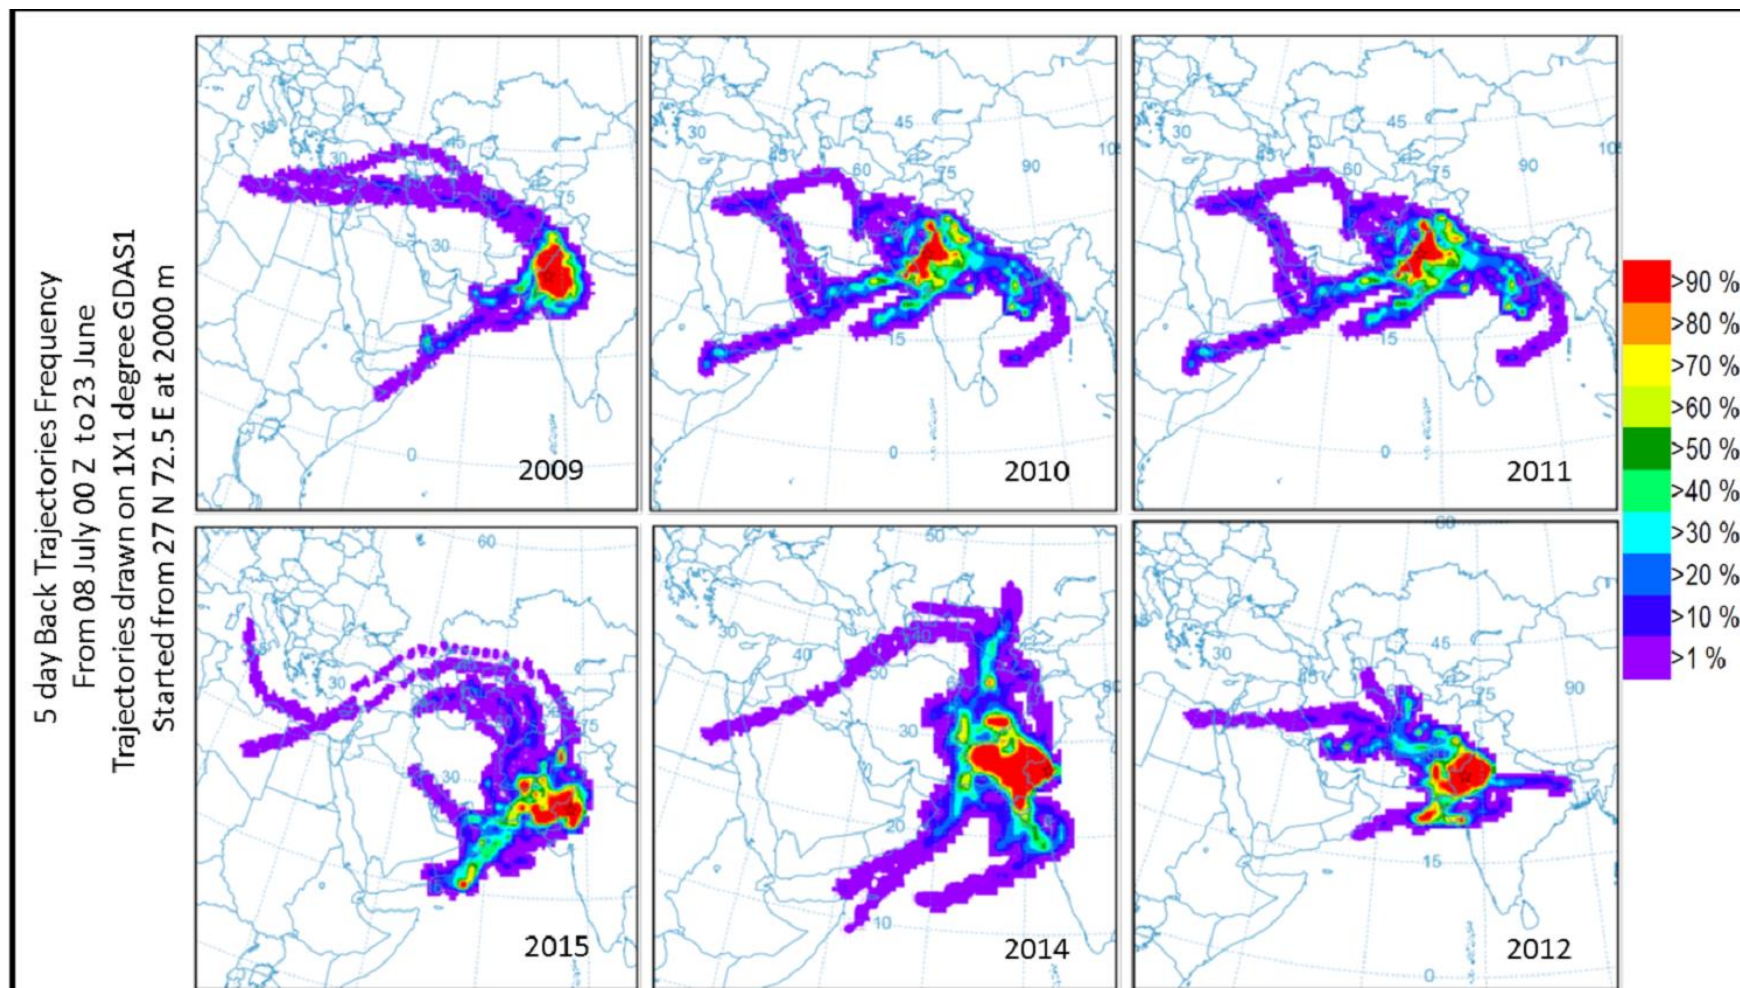

**Figure S9.** Frequency distribution of all 5 day back-trajectories computed from 08 July onwards, the first and fourth subpanel indicates years experiencing SDP, second and fifth for those having MDP and third and sixth corresponding to LDP.

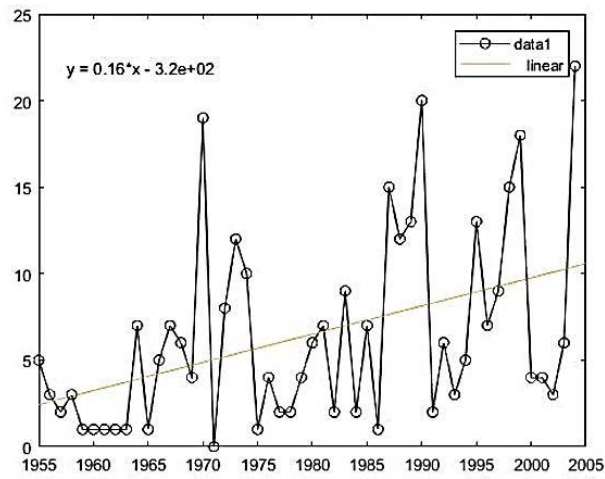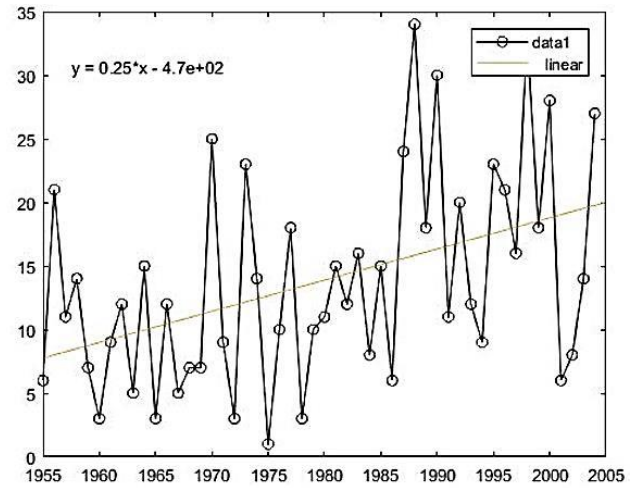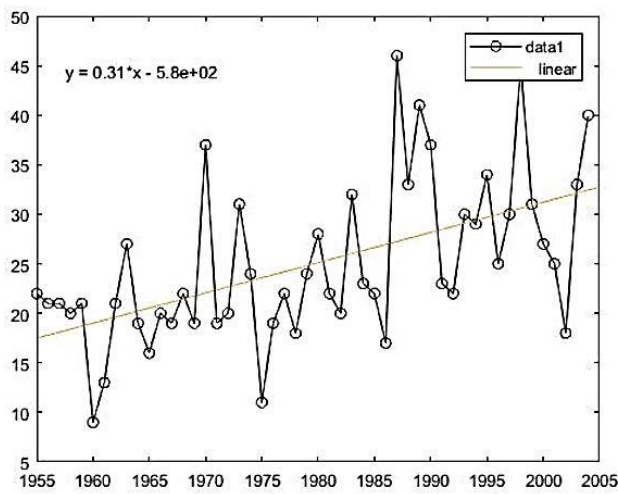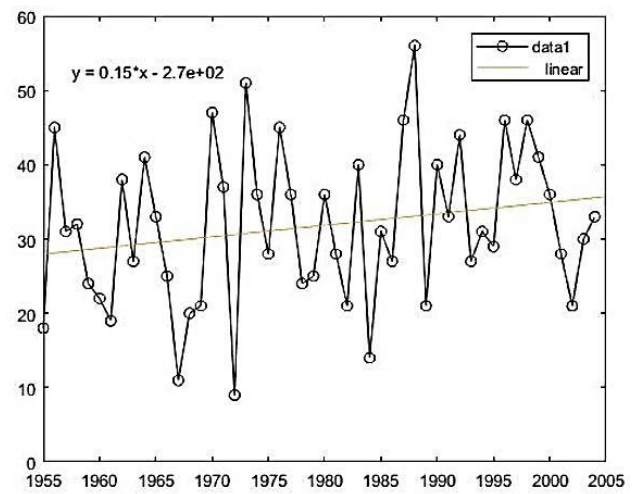

**Figure S10.** Demonstration of trends in DDF from multi model mean historical datasets of 3 GCMs during 1955-2005.
